# Supplementary material
Source: PubMed Central journal article supplement (PMC5103097)

## Supplementary data

Table S1 – Significantly altered genes between all tested conditions

Figure S1 - Menaquinol pathway. This figure illustrates the Menaquinol pathway as proposed by KEGG. Colored genes are present in *A. muciniphila* Muc<sup>T</sup>.

Figure S2 – Simplified schematic representation of the metabolic pathways propionate and acetate (NAD<sup>+</sup> pool) of *A. muciniphila*. Pyruvate to propionate results in netto 2 oxidized NADH to 2 NAD<sup>+</sup>, while pyruvate to acetate production results in netto 1 reduced NAD<sup>+</sup>.

Figure S3. Heme depended oxygen reduction. The oxygen was completely reduced when heme was present (aerobic fermentor + heme) and accumulated when no heme was present (aerobic fermentor – heme). The anaerobic fermentor was included to determine the influence of heme. The negative control fermentors without bacteria and with and without heme showed no difference in dissolved oxygen concentration.

**T1vsT2\_no\_O2**

| Gene code | Annotation                                            | 2logFC | 2logCPM | PValue   |
|-----------|-------------------------------------------------------|--------|---------|----------|
| Amuc_0037 | amino acid permease                                   | 1,03   | 9,57    | 2,85E-02 |
| Amuc_0038 | glutaminase                                           | 1,18   | 8,97    | 1,68E-02 |
| Amuc_0089 | hypothetical protein                                  | 1,44   | 7,19    | 3,89E-03 |
| Amuc_0101 | hypothetical protein                                  | -1,29  | 14,74   | 4,25E-02 |
| Amuc_0239 | hypothetical protein                                  | -1,12  | 5,05    | 3,67E-02 |
| Amuc_0242 | pseudouridine synthase                                | -0,78  | 10,15   | 2,28E-02 |
| Amuc_0259 | hypothetical protein                                  | -1,05  | 6,67    | 3,38E-02 |
| Amuc_0266 | 50S ribosomal protein L32                             | -0,86  | 8,06    | 4,85E-02 |
| Amuc_0330 | hypothetical protein                                  | -1,13  | 9,17    | 9,20E-03 |
| Amuc_0410 | hypothetical protein                                  | 1,03   | 4,21    | 4,38E-02 |
| Amuc_0468 | DeoR family transcriptional regulator                 | -0,84  | 8,62    | 2,29E-02 |
| Amuc_0469 | N-acetyltransferase GCN5                              | -1,04  | 9,10    | 1,92E-02 |
| Amuc_0504 | hypothetical protein                                  | 0,75   | 6,62    | 4,67E-02 |
| Amuc_0566 | hypothetical protein                                  | -1,66  | 2,63    | 1,57E-02 |
| Amuc_0580 | entericidin EcnAB                                     | -1,31  | 8,16    | 3,10E-02 |
| Amuc_0606 | hypothetical protein                                  | -1,43  | 7,69    | 1,30E-02 |
| Amuc_0691 | thioredoxin                                           | -0,84  | 10,35   | 4,79E-02 |
| Amuc_0748 | riboflavin biosynthesis protein RibF                  | -0,74  | 7,49    | 4,26E-02 |
| Amuc_0753 | glycosyl transferase family protein                   | 0,80   | 7,34    | 4,68E-02 |
| Amuc_0819 | multi antimicrobial extrusion protein MatE            | -1,22  | 7,51    | 3,30E-02 |
| Amuc_0976 | hypothetical protein                                  | -0,85  | 7,69    | 8,90E-03 |
| Amuc_1022 | G-D-S-L family lipolytic protein                      | 0,74   | 7,77    | 3,02E-02 |
| Amuc_1087 | hypothetical protein                                  | -2,70  | 6,04    | 3,46E-02 |
| Amuc_1137 | hypothetical protein                                  | -0,93  | 7,06    | 4,75E-02 |
| Amuc_1363 | hypothetical protein                                  | -1,00  | 8,97    | 2,59E-02 |
| Amuc_1364 | hypothetical protein                                  | -1,10  | 9,28    | 1,33E-02 |
| Amuc_1386 | dihydropteroate synthase                              | -1,00  | 6,83    | 1,24E-02 |
| Amuc_1409 | hypothetical protein                                  | -1,54  | 12,23   | 1,21E-02 |
| Amuc_1430 | 50S ribosomal protein L31                             | -0,97  | 9,98    | 1,02E-02 |
| Amuc_1508 | hypothetical protein                                  | 1,98   | 0,56    | 1,09E-02 |
| Amuc_1529 | hypothetical protein                                  | -1,09  | 9,42    | 5,54E-03 |
| Amuc_1531 | anthranilate synthase                                 | 0,97   | 9,01    | 7,01E-03 |
| Amuc_1540 | 50S ribosomal protein L36                             | -1,09  | 10,25   | 1,07E-02 |
| Amuc_1567 | methylated-DNA--protein-cysteine methyltransferase    | -0,84  | 6,78    | 1,10E-02 |
| Amuc_1593 | hypothetical protein                                  | 0,75   | 6,06    | 4,54E-02 |
| Amuc_1679 | Xylose isomerase domain-containing protein TIM barrel | 0,78   | 6,21    | 4,79E-02 |
| Amuc_1717 | hypothetical protein                                  | -0,94  | 11,51   | 2,78E-02 |
| Amuc_1790 | PDZ/DHR/GLGF domain-containing protein                | 0,75   | 6,54    | 3,16E-02 |
| Amuc_1896 | histone family protein DNA-binding protein            | -1,31  | 11,34   | 9,73E-03 |
| Amuc_1899 | flavodoxin/nitric oxide synthase                      | -1,24  | 8,82    | 9,58E-03 |
| Amuc_1936 | hypothetical protein                                  | -1,30  | 9,84    | 2,44E-03 |
| Amuc_2072 | rubrerythrin                                          | -1,09  | 9,02    | 2,72E-03 |

## T1vsT2\_O2

| Gene code | Annotation                                                                      | ZlogFC | ZlogCPM | PValue   |
|-----------|---------------------------------------------------------------------------------|--------|---------|----------|
| Amuc_0016 | hypothetical protein                                                            | 1.02   | 12,90   | 4,84E-02 |
| Amuc_0037 | amino acid permease                                                             | 2.16   | 9,57    | 6,76E-06 |
| Amuc_0038 | glutaminase                                                                     | -1.34  | 8,97    | 1,73E-04 |
| Amuc_0089 | hypothetical protein                                                            | 2.65   | 7,19    | 9,65E-08 |
| Amuc_0130 | hypothetical protein                                                            | 1.33   | 4,14    | 4,30E-02 |
| Amuc_0131 | hypothetical protein                                                            | 1.70   | 3,97    | 2,71E-03 |
| Amuc_0204 | sodium ion-translocating decarboxylase subunit beta                             | 0.66   | 9,01    | 4,58E-02 |
| Amuc_0213 | glutamyl-tRNA(Gln) amidotransferase subunit B                                   | -0.79  | 10,09   | 3,76E-02 |
| Amuc_0220 | hydrophobe/amphiphile efflux-1 (HAE1) family transporter                        | -2.10  | 9,32    | 8,69E-04 |
| Amuc_0236 | ion transport 2 domain-containing protein                                       | 0.95   | 7,04    | 5,38E-03 |
| Amuc_0237 | arsenate reductase-like protein                                                 | 0.65   | 8,11    | 3,47E-02 |
| Amuc_0267 | hypothetical protein                                                            | -0.73  | 10,97   | 4,23E-02 |
| Amuc_0270 | shikimate kinase                                                                | -1.00  | 8,85    | 1,11E-02 |
| Amuc_0271 | 30S ribosomal protein S16                                                       | -1.14  | 9,45    | 1,68E-02 |
| Amuc_0275 | preprotein translocase subunit YajC                                             | -0.86  | 10,48   | 2,10E-02 |
| Amuc_0327 | hypothetical protein                                                            | -1.57  | 9,96    | 2,79E-02 |
| Amuc_0328 | hypothetical protein                                                            | -1.19  | 11,38   | 4,94E-02 |
| Amuc_0330 | hypothetical protein                                                            | -1.72  | 9,17    | 7,01E-04 |
| Amuc_0372 | glutamate decarboxylase                                                         | 1.22   | 11,79   | 7,61E-03 |
| Amuc_0384 | Maltose O-acetyltransferase                                                     | 0.62   | 7,40    | 4,86E-02 |
| Amuc_0469 | N-acetyltransferase GCN5                                                        | -1.04  | 9,10    | 1,92E-02 |
| Amuc_0485 | 50S ribosomal protein L27                                                       | -0.94  | 9,05    | 3,41E-02 |
| Amuc_0583 | hypothetical protein                                                            | -1.29  | 6,30    | 2,56E-02 |
| Amuc_0606 | hypothetical protein                                                            | -1.46  | 7,69    | 1,11E-02 |
| Amuc_0632 | family 2 glycosyl transferase                                                   | -0.68  | 7,73    | 3,73E-02 |
| Amuc_0677 | hypothetical protein                                                            | 0.66   | 7,05    | 3,80E-02 |
| Amuc_0687 | outer membrane autotransporter barrel domain-containing protein                 | -1.15  | 11,64   | 1,16E-04 |
| Amuc_0717 | amino acid permease                                                             | 0.86   | 8,64    | 1,70E-02 |
| Amuc_0748 | riboflavin biosynthesis protein RibF                                            | -0.76  | 7,49    | 3,77E-02 |
| Amuc_0767 | hypothetical protein                                                            | 1.09   | 7,65    | 2,60E-03 |
| Amuc_0772 | phosphoglycerate mutase                                                         | 1.15   | 8,95    | 1,74E-03 |
| Amuc_0773 | acyltransferase 3                                                               | 0.69   | 7,14    | 3,59E-02 |
| Amuc_0777 | short-chain dehydrogenase/reductase SDR                                         | 2.51   | 6,92    | 3,49E-05 |
| Amuc_0778 | hypothetical protein                                                            | 0.83   | 6,04    | 4,84E-02 |
| Amuc_0803 | coagulation factor 5/8 type domain-containing protein                           | 0.87   | 9,38    | 1,62E-02 |
| Amuc_0818 | adenosylhomocysteinase                                                          | -0.83  | 7,14    | 3,20E-02 |
| Amuc_0819 | multi antimicrobial extrusion protein MatE                                      | -1.28  | 7,51    | 2,48E-02 |
| Amuc_0868 | beta-N-acetylhexosaminidase                                                     | 0.74   | 7,29    | 3,14E-02 |
| Amuc_0882 | hypothetical protein                                                            | 1.34   | 12,90   | 4,17E-03 |
| Amuc_0883 | hypothetical protein                                                            | 1.38   | 9,10    | 1,47E-03 |
| Amuc_0907 | hypothetical protein                                                            | -1.26  | 9,19    | 3,09E-02 |
| Amuc_0925 | KOW domain-containing protein                                                   | -0.93  | 10,99   | 4,35E-02 |
| Amuc_0947 | biotin/lipoyl attachment domain-containing protein                              | 0.70   | 7,78    | 3,24E-02 |
| Amuc_0998 | hypothetical protein                                                            | 1.28   | 7,62    | 9,53E-03 |
| Amuc_1090 | FeoA family protein                                                             | -0.88  | 9,43    | 4,82E-02 |
| Amuc_1107 | ATP phosphoribosyltransferase                                                   | -0.98  | 11,20   | 3,17E-02 |
| Amuc_1141 | glycosyl transferase family protein                                             | 1.76   | 6,93    | 1,46E-02 |
| Amuc_1176 | hypothetical protein                                                            | -0.76  | 8,59    | 8,01E-05 |
| Amuc_1177 | lipocalin family protein                                                        | 1.39   | 6,25    | 9,40E-04 |
| Amuc_1196 | hypothetical protein                                                            | -0.90  | 7,77    | 1,67E-02 |
| Amuc_1213 | hypothetical protein                                                            | -1.53  | 10,91   | 5,35E-04 |
| Amuc_1229 | hypothetical protein                                                            | -0.80  | 11,64   | 4,14E-02 |
| Amuc_1293 | hypothetical protein                                                            | -1.79  | 6,81    | 6,33E-05 |
| Amuc_1294 | sulfite reductase                                                               | -1.45  | 11,21   | 3,11E-03 |
| Amuc_1295 | binding-protein-dependent transporters inner membrane component                 | -2.08  | 10,99   | 4,19E-06 |
| Amuc_1296 | ABC transporter                                                                 | -1.88  | 9,96    | 5,47E-05 |
| Amuc_1297 | substrate-binding protein of aliphatic sulfonate ABC transporter                | -2.01  | 10,18   | 2,19E-06 |
| Amuc_1298 | sulfate adenylyltransferase, large subunit                                      | -1.72  | 10,77   | 4,30E-05 |
| Amuc_1299 | sulfate adenylyltransferase subunit 2                                           | -1.25  | 10,39   | 6,08E-03 |
| Amuc_1300 | adenylsulfate reductase                                                         | -0.85  | 10,96   | 3,33E-02 |
| Amuc_1342 | hypothetical protein                                                            | 1.08   | 10,14   | 4,64E-02 |
| Amuc_1363 | hypothetical protein                                                            | -0.99  | 8,97    | 2,83E-02 |
| Amuc_1364 | hypothetical protein                                                            | -1.16  | 9,28    | 9,50E-03 |
| Amuc_1365 | hypothetical protein                                                            | -1.52  | 9,52    | 6,28E-03 |
| Amuc_1368 | hypothetical protein                                                            | -1.22  | 8,45    | 9,89E-03 |
| Amuc_1381 | ABC transporter                                                                 | 0.86   | 6,46    | 1,83E-02 |
| Amuc_1394 | hypothetical protein                                                            | 1.20   | 7,82    | 4,38E-03 |
| Amuc_1409 | hypothetical protein                                                            | -1.20  | 12,23   | 4,84E-02 |
| Amuc_1451 | hypothetical protein                                                            | -0.97  | 8,25    | 6,97E-03 |
| Amuc_1497 | hypothetical protein                                                            | 1.04   | 8,19    | 3,51E-02 |
| Amuc_1529 | hypothetical protein                                                            | -1.10  | 9,42    | 5,08E-03 |
| Amuc_1540 | 50S ribosomal protein L36                                                       | -0.86  | 10,25   | 4,27E-02 |
| Amuc_1594 | NCAIR mutase-like protein                                                       | 0.77   | 6,24    | 4,66E-02 |
| Amuc_1602 | hypothetical protein                                                            | 0.93   | 8,25    | 2,62E-02 |
| Amuc_1613 | NADH dehydrogenase (ubiquinone) 24 kDa subunit                                  | -0.81  | 9,83    | 3,93E-02 |
| Amuc_1674 | hypothetical protein                                                            | 1.16   | 4,70    | 4,30E-02 |
| Amuc_1676 | Eco57I restriction endonuclease                                                 | -1.11  | 7,50    | 2,81E-02 |
| Amuc_1684 | TonB-dependent receptor                                                         | 1.72   | 7,88    | 4,36E-02 |
| Amuc_1692 | 2-oxoglutarate dehydrogenase, E2 subunit, dihydroliipoamide succinyltransferase | 1.02   | 7,77    | 1,53E-02 |
| Amuc_1693 | 2-oxoglutarate dehydrogenase, E1 subunit                                        | 0.99   | 9,86    | 1,70E-02 |
| Amuc_1717 | hypothetical protein                                                            | -1.30  | 11,51   | 2,65E-03 |
| Amuc_1743 | hypothetical protein                                                            | 0.98   | 7,43    | 8,84E-03 |
| Amuc_1770 | AsnC family transcriptional regulator                                           | -0.83  | 9,13    | 2,02E-02 |
| Amuc_1812 | alpha-amylase                                                                   | 1.89   | 10,22   | 5,33E-05 |
| Amuc_1838 | hypothetical protein                                                            | -1.04  | 7,93    | 4,40E-03 |
| Amuc_1839 | heavy metal translocating P-type ATPase                                         | 3.19   | 7,44    | 1,31E-05 |
| Amuc_1870 | Alpha-glucosidase                                                               | -0.77  | 9,54    | 2,61E-02 |
| Amuc_1896 | histone family protein DNA-binding protein                                      | -1.39  | 11,34   | 6,39E-03 |
| Amuc_1904 | hypothetical protein                                                            | 1.42   | 5,93    | 4,38E-03 |
| Amuc_1914 | restriction modification system DNA specificity domain                          | -0.87  | 9,25    | 4,02E-02 |
| Amuc_1990 | pyrroline-5-carboxylate reductase                                               | 0.76   | 5,90    | 4,00E-02 |
| Amuc_2015 | thiamine-phosphate pyrophosphorylase                                            | -1.91  | 9,49    | 8,48E-04 |
| Amuc_2016 | Hydroxyethylthiazole kinase                                                     | -0.94  | 9,55    | 2,54E-02 |
| Amuc_2035 | hypothetical protein                                                            | 1.31   | 5,04    | 3,25E-02 |
| Amuc_2038 | PUR-alpha/beta/gamma DNA/RNA-binding protein                                    | -0.90  | 10,64   | 2,56E-02 |
| Amuc_2051 | glutamate dehydrogenase                                                         | -0.98  | 10,01   | 2,27E-02 |
| Amuc_2053 | hypothetical protein                                                            | -1.04  | 8,02    | 1,03E-02 |
| Amuc_2055 | hypothetical protein                                                            | 1.18   | 9,20    | 6,54E-03 |
| Amuc_2058 | hypothetical protein                                                            | 1.13   | 6,15    | 1,59E-02 |
| Amuc_2060 | hypothetical protein                                                            | 0.95   | 6,42    | 2,67E-02 |
| Amuc_2061 | hypothetical protein                                                            | 1.28   | 4,07    | 2,91E-02 |
| Amuc_2070 | hydroperoxidase II                                                              | -0.95  | 10,78   | 8,61E-05 |
| Amuc_2078 | capsular polysaccharide biosynthesis protein                                    | 0.87   | 9,28    | 2,26E-02 |
| Amuc_2079 | PHP domain-containing protein                                                   | 1.15   | 6,07    | 3,06E-02 |
| Amuc_2080 | sugar transferase                                                               | 1.37   | 7,19    | 1,63E-03 |
| Amuc_2081 | family 2 glycosyl transferase                                                   | 1.05   | 6,65    | 7,28E-03 |
| Amuc_2082 | group 1 glycosyl transferase                                                    | 0.94   | 7,07    | 1,31E-02 |
| Amuc_2084 | group 1 glycosyl transferase                                                    | 1.16   | 6,54    | 1,15E-02 |
| Amuc_2085 | hypothetical protein                                                            | 1.55   | 5,56    | 2,67E-03 |
| Amuc_2088 | group 1 glycosyl transferase                                                    | 1.21   | 4,75    | 4,48E-02 |
| Amuc_2093 | family 2 glycosyl transferase                                                   | 1.15   | 4,42    | 2,35E-02 |
| Amuc_2094 | family 2 glycosyl transferase                                                   | 0.88   | 4,65    | 4,71E-02 |
| Amuc_2129 | nickel-dependent hydrogenase large subunit                                      | 0.97   | 9,03    | 1,10E-02 |
| Amuc_2130 | cytochrome B561                                                                 | 0.96   | 8,73    | 1,00E-02 |
| Amuc_2131 | hydrogenase maturation protease                                                 | 1.31   | 6,72    | 5,55E-03 |
| Amuc_2132 | hydrogenase nickel incorporation protein HypA                                   | 1.02   | 5,39    | 1,77E-02 |
| Amuc_2141 | hypothetical protein                                                            | -0.92  | 9,89    | 2,68E-02 |
| Amuc_2176 | exonuclease ABC subunit A                                                       | 0.90   | 8,75    | 5,75E-03 |

**T2\_O2vsT2\_no\_O2**

| Gene code | Annotation                                                       | 2logFC | 2logCPM | PValue   |
|-----------|------------------------------------------------------------------|--------|---------|----------|
| Amuc_0037 | amino acid permease                                              | 1,13   | 9,57    | 2,88E-02 |
| Amuc_0089 | hypothetical protein                                             | 1,21   | 7,19    | 1,58E-02 |
| Amuc_0236 | Ion transport 2 domain-containing protein                        | 0,88   | 7,04    | 1,73E-02 |
| Amuc_0342 | OsmC family protein                                              | 0,81   | 6,76    | 3,25E-02 |
| Amuc_0580 | entericidin EcnAB                                                | 1,93   | 8,16    | 2,65E-03 |
| Amuc_0687 | outer membrane autotransporter barrel domain-containing protein  | 1,31   | 11,64   | 3,28E-02 |
| Amuc_0719 | hypothetical protein                                             | -1,14  | 9,81    | 1,08E-02 |
| Amuc_0777 | short-chain dehydrogenase/reductase SDR                          | 1,41   | 6,92    | 2,53E-02 |
| Amuc_0844 | Phosphopyruvate hydratase                                        | 1,40   | 8,27    | 3,18E-02 |
| Amuc_0882 | hypothetical protein                                             | 1,00   | 12,90   | 4,94E-02 |
| Amuc_0883 | hypothetical protein                                             | 1,56   | 9,10    | 1,10E-03 |
| Amuc_0998 | hypothetical protein                                             | 1,37   | 7,62    | 1,17E-02 |
| Amuc_0999 | sigma 54 modulation protein/ribosomal protein S30EA              | 1,08   | 10,76   | 1,02E-02 |
| Amuc_1016 | hypothetical protein                                             | -0,82  | 6,43    | 4,36E-02 |
| Amuc_1176 | hypothetical protein                                             | 0,88   | 8,59    | 3,43E-02 |
| Amuc_1177 | lipocalin family protein                                         | 0,96   | 6,25    | 2,85E-02 |
| Amuc_1255 | hypothetical protein                                             | -0,72  | 7,52    | 3,83E-02 |
| Amuc_1293 | hypothetical protein                                             | -1,26  | 6,81    | 5,75E-03 |
| Amuc_1295 | binding-protein-dependent transporters inner membrane component  | -1,72  | 10,99   | 1,90E-04 |
| Amuc_1296 | ABC transporter                                                  | -1,66  | 9,96    | 5,41E-04 |
| Amuc_1297 | substrate-binding protein of aliphatic sulfonate ABC transporter | -1,56  | 10,18   | 3,19E-04 |
| Amuc_1298 | sulfate adenylyltransferase, large subunit                       | -1,23  | 10,77   | 4,39E-03 |
| Amuc_1394 | hypothetical protein                                             | 1,41   | 7,82    | 2,28E-03 |
| Amuc_1570 | hypothetical protein                                             | -0,76  | 7,92    | 2,11E-02 |
| Amuc_1592 | Superoxide dismutase                                             | 0,92   | 9,77    | 4,91E-02 |
| Amuc_1655 | sulfatase                                                        | 0,73   | 8,98    | 2,62E-02 |
| Amuc_1812 | alpha-amylase                                                    | 1,02   | 10,22   | 4,37E-02 |
| Amuc_1839 | heavy metal translocating P-type ATPase                          | 3,51   | 7,44    | 2,46E-05 |
| Amuc_1904 | hypothetical protein                                             | 1,12   | 5,93    | 3,56E-02 |
| Amuc_1936 | hypothetical protein                                             | 1,24   | 9,84    | 5,74E-03 |
| Amuc_2015 | thiamine-phosphate pyrophosphorylase                             | -0,75  | 9,49    | 4,47E-02 |
| Amuc_2055 | hypothetical protein                                             | 1,22   | 9,20    | 1,04E-02 |
| Amuc_2069 | hypothetical protein                                             | -2,11  | 3,59    | 3,80E-02 |
| Amuc_2070 | hydroperoxidase II                                               | 1,16   | 10,78   | 3,71E-02 |
| Amuc_2072 | rubrerythrin                                                     | 0,98   | 9,02    | 9,80E-03 |
| Amuc_2081 | family 2 glycosyl transferase                                    | 0,86   | 6,65    | 4,01E-02 |
| Amuc_2111 | ErfK/YbiS/YcfS/YnhG family protein                               | -0,80  | 8,57    | 3,29E-02 |
| Amuc_2176 | excinuclease ABC subunit A                                       | 1,14   | 8,75    | 1,29E-03 |

## T3\_O2vsT3\_no\_O2

| Gene code | Annotation                                                                     | zlogFC | zlogCPM | PValue   |
|-----------|--------------------------------------------------------------------------------|--------|---------|----------|
| Amuc_0038 | glutaminase                                                                    | 1.32   | 8,97    | 3,47E-02 |
| Amuc_0059 | ATPase AAA                                                                     | 1.04   | 11,25   | 1,68E-02 |
| Amuc_0175 | PDZ/DHR/GLGF domain-containing protein                                         | 1.30   | 8,86    | 3,57E-03 |
| Amuc_0213 | glutamyl-tRNA(Gln) amidotransferase subunit B                                  | -1.18  | 10,09   | 6,68E-03 |
| Amuc_0250 | hypothetical protein                                                           | -1.71  | 8,08    | 2,23E-02 |
| Amuc_0252 | hypothetical protein                                                           | -1.02  | 7,89    | 1,67E-02 |
| Amuc_0270 | shikimate kinase                                                               | -0.95  | 8,85    | 3,27E-02 |
| Amuc_0291 | valyl-tRNA synthetase                                                          | -0.89  | 9,57    | 2,10E-02 |
| Amuc_0337 | prephenate dehydrogenase                                                       | 0.82   | 6,99    | 3,14E-02 |
| Amuc_0360 | hypothetical protein                                                           | 1.12   | 8,92    | 2,42E-02 |
| Amuc_0422 | 3,4-dihydroxy-2-butanone 4-phosphate synthase                                  | -1.00  | 9,48    | 2,25E-02 |
| Amuc_0423 | 6,7-dimethyl-8-ribityllumazine synthase                                        | -1.29  | 6,90    | 6,87E-03 |
| Amuc_0424 | NusB antitermination factor                                                    | -0.94  | 7,59    | 4,26E-02 |
| Amuc_0425 | signal recognition particle-docking protein FtsY                               | -1.14  | 7,15    | 1,21E-02 |
| Amuc_0426 | radical SAM enzyme, Cfr family                                                 | -0.93  | 9,11    | 1,46E-02 |
| Amuc_0436 | HAD-superfamily hydrolase                                                      | -0.90  | 8,49    | 3,38E-02 |
| Amuc_0439 | 30S ribosomal protein S13                                                      | -1.03  | 9,91    | 1,58E-02 |
| Amuc_0445 | GTP-binding protein YchF                                                       | -0.97  | 8,61    | 2,08E-02 |
| Amuc_0463 | Phosphopantothienoylcysteine decarboxylase                                     | -0.81  | 7,30    | 3,09E-02 |
| Amuc_0469 | N-acetyltransferase GCN5                                                       | 1.35   | 9,10    | 1,28E-02 |
| Amuc_0475 | methyltransferase                                                              | 0.81   | 6,76    | 4,60E-02 |
| Amuc_0485 | 50S ribosomal protein L27                                                      | -1.00  | 9,05    | 4,80E-02 |
| Amuc_0488 | FeS assembly protein SufB                                                      | 0.87   | 9,43    | 3,33E-02 |
| Amuc_0489 | SufBD protein                                                                  | 1.13   | 9,26    | 1,26E-02 |
| Amuc_0533 | hypothetical protein                                                           | -0.89  | 7,79    | 3,24E-02 |
| Amuc_0534 | phosphoribosylformylglycinamide synthase II                                    | -0.79  | 9,89    | 4,91E-02 |
| Amuc_0556 | FmdB family regulatory protein                                                 | 1.11   | 5,23    | 3,44E-02 |
| Amuc_0573 | 3'-5' exonuclease                                                              | -0.88  | 9,20    | 3,85E-02 |
| Amuc_0616 | protein serine/threonine phosphatase                                           | 1.09   | 7,42    | 4,60E-02 |
| Amuc_0642 | tRNA delta(2)-isopentenylpyrophosphate transferase                             | -1.13  | 5,44    | 3,68E-02 |
| Amuc_0650 | S-adenosyl-methyltransferase MraW                                              | 0.75   | 9,03    | 4,51E-02 |
| Amuc_0760 | hypothetical protein                                                           | -0.95  | 7,28    | 4,94E-02 |
| Amuc_0775 | thioesterase                                                                   | 1.28   | 7,60    | 4,20E-02 |
| Amuc_0787 | rhomboid family protein                                                        | -1.25  | 9,21    | 1,69E-02 |
| Amuc_0844 | Phosphopyruvate hydratase                                                      | 2.13   | 8,27    | 7,11E-03 |
| Amuc_0850 | RNA methyltransferase, TrmA family                                             | -0.78  | 7,96    | 4,04E-02 |
| Amuc_0865 | rubrerythrin                                                                   | 2.03   | 9,33    | 1,97E-03 |
| Amuc_0868 | beta-N-acetylhexosaminidase                                                    | 0.92   | 7,29    | 3,25E-02 |
| Amuc_0876 | heavy metal translocating P-type ATPase                                        | 1.45   | 8,47    | 5,57E-03 |
| Amuc_0888 | MerR family transcriptional regulator                                          | 0.99   | 6,48    | 4,90E-02 |
| Amuc_0955 | ribosome-binding factor A                                                      | -1.21  | 9,71    | 3,21E-02 |
| Amuc_0961 | hypothetical protein                                                           | 1.61   | 8,11    | 2,03E-04 |
| Amuc_0962 | 4Fe-4S ferredoxin                                                              | 1.10   | 7,63    | 4,60E-03 |
| Amuc_0983 | YD repeat protein                                                              | 1.18   | 10,61   | 2,85E-02 |
| Amuc_0988 | TatD-related deoxyribonuclease                                                 | 0.98   | 7,03    | 1,61E-02 |
| Amuc_1017 | hypothetical protein                                                           | -1.28  | 7,25    | 3,61E-02 |
| Amuc_1030 | cupin                                                                          | -1.08  | 5,44    | 3,27E-02 |
| Amuc_1084 | hypothetical protein                                                           | 4.33   | 7,04    | 6,64E-04 |
| Amuc_1089 | FeoA family protein                                                            | 1.15   | 10,63   | 3,98E-02 |
| Amuc_1090 | FeoA family protein                                                            | 1.22   | 9,43    | 2,58E-02 |
| Amuc_1145 | hypothetical protein                                                           | -0.98  | 10,22   | 2,49E-02 |
| Amuc_1177 | lipocalin family protein                                                       | 1.15   | 6,25    | 2,27E-02 |
| Amuc_1187 | Alpha-galactosidase                                                            | 1.04   | 9,85    | 4,58E-02 |
| Amuc_1211 | N-acetylmuramoyl-L-alanine amidase family 2 protein                            | 0.91   | 7,15    | 3,60E-02 |
| Amuc_1219 | hypothetical protein                                                           | -1.35  | 9,65    | 4,26E-02 |
| Amuc_1222 | oligopeptide transporter                                                       | -0.75  | 8,69    | 3,53E-02 |
| Amuc_1250 | carbamoyl-phosphate synthase small subunit                                     | -0.88  | 8,15    | 2,08E-02 |
| Amuc_1290 | hypothetical protein                                                           | 1.02   | 9,17    | 2,42E-02 |
| Amuc_1291 | surface layer protein                                                          | 1.32   | 7,32    | 7,79E-03 |
| Amuc_1295 | binding-protein-dependent transporters inner membrane component                | -1.17  | 10,99   | 1,75E-02 |
| Amuc_1297 | substrate-binding protein of aliphatic sulfonate ABC transporter               | -1.18  | 10,18   | 1,11E-02 |
| Amuc_1298 | sulfate adenylyltransferase, large subunit                                     | -1.42  | 10,77   | 2,47E-03 |
| Amuc_1299 | sulfate adenylyltransferase subunit 2                                          | -1.50  | 10,39   | 3,57E-03 |
| Amuc_1300 | adenyllylsulfate reductase                                                     | -1.33  | 10,96   | 3,49E-03 |
| Amuc_1301 | cysteine synthase A                                                            | -1.19  | 11,38   | 1,13E-02 |
| Amuc_1309 | aldose 1-epimerase                                                             | 1.30   | 8,74    | 3,02E-03 |
| Amuc_1310 | 17 kDa surface antigen                                                         | 0.91   | 9,36    | 2,70E-02 |
| Amuc_1321 | alkyl hydroperoxide reductase                                                  | 2.34   | 10,72   | 6,90E-04 |
| Amuc_1343 | hypothetical protein                                                           | -1.30  | 7,46    | 3,23E-02 |
| Amuc_1408 | chaperonin GroEL                                                               | 0.91   | 12,13   | 4,18E-02 |
| Amuc_1412 | hypothetical protein                                                           | 0.85   | 10,64   | 4,93E-02 |
| Amuc_1517 | ECF subfamily RNA polymerase sigma-24 subunit                                  | 0.86   | 7,61    | 3,19E-02 |
| Amuc_1537 | outer membrane autotransporter barrel domain-containing protein                | 1.12   | 11,00   | 1,77E-02 |
| Amuc_1609 | 4Fe-4S ferredoxin                                                              | -0.99  | 8,25    | 1,36E-02 |
| Amuc_1612 | NADH dehydrogenase (quinone)                                                   | -0.79  | 9,51    | 2,83E-02 |
| Amuc_1653 | Ribulose-phosphate 3-epimerase                                                 | -0.84  | 7,02    | 3,81E-02 |
| Amuc_1654 | leucyl-tRNA synthetase                                                         | -0.89  | 10,73   | 3,05E-02 |
| Amuc_1692 | 2-oxoglutarate dehydrogenase, E2 subunit, dihydrolipoamide succinyltransferase | 1.19   | 7,77    | 2,35E-02 |
| Amuc_1693 | 2-oxoglutarate dehydrogenase, E1 subunit                                       | 1.57   | 9,86    | 3,34E-03 |
| Amuc_1694 | cytochrome d ubiquinol oxidase, subunit II                                     | 1.47   | 7,92    | 6,53E-03 |
| Amuc_1757 | phosphotransferase system, phosphocarrier protein HPr                          | 1.45   | 9,97    | 4,13E-03 |
| Amuc_1764 | hypothetical protein                                                           | -1.28  | 7,66    | 1,20E-02 |
| Amuc_1776 | hypothetical protein                                                           | 1.09   | 9,66    | 1,74E-02 |
| Amuc_1777 | von Willebrand factor type A                                                   | 1.19   | 12,17   | 2,25E-02 |
| Amuc_1780 | hypothetical protein                                                           | 0.93   | 7,67    | 3,35E-02 |
| Amuc_1814 | hypothetical protein                                                           | -1.34  | 5,86    | 3,92E-02 |
| Amuc_1843 | hypothetical protein                                                           | 1.17   | 6,11    | 3,16E-02 |
| Amuc_1901 | metallophosphoesterase                                                         | -1.23  | 8,28    | 2,28E-02 |
| Amuc_1902 | hypothetical protein                                                           | -1.44  | 10,54   | 2,39E-03 |
| Amuc_1903 | hypothetical protein                                                           | -1.06  | 9,13    | 2,02E-02 |
| Amuc_1922 | ferredoxin                                                                     | 1.07   | 11,13   | 3,88E-02 |
| Amuc_1960 | PA14 domain-containing protein                                                 | 1.07   | 6,59    | 4,92E-02 |
| Amuc_1965 | aspartate kinase                                                               | -0.82  | 8,72    | 3,67E-02 |
| Amuc_1972 | HhH-GPD family protein                                                         | -0.86  | 7,24    | 4,69E-02 |
| Amuc_1985 | hypothetical protein                                                           | 0.88   | 9,05    | 1,89E-02 |
| Amuc_2051 | glutamate dehydrogenase                                                        | -1.01  | 10,01   | 3,73E-02 |
| Amuc_2054 | hypothetical protein                                                           | -1.08  | 6,15    | 3,90E-02 |
| Amuc_2072 | rubrerythrin                                                                   | 1.31   | 9,02    | 3,07E-03 |
| Amuc_2111 | ErrK/YbiS/Ycfs/YnhG family protein                                             | -0.95  | 8,57    | 1,96E-02 |
| Amuc_2120 | hypothetical protein                                                           | 1.12   | 7,78    | 9,56E-03 |
| Amuc_2129 | nickel-dependent hydrogenase large subunit                                     | 1.46   | 9,03    | 2,85E-03 |
| Amuc_2130 | cytochrome B561                                                                | 1.58   | 8,73    | 1,04E-03 |
| Amuc_2131 | hydrogenase maturation protease                                                | 1.79   | 6,72    | 3,28E-03 |
| Amuc_2136 | Glycoside hydrolase, family 20, catalytic core                                 | 0.98   | 10,15   | 1,47E-02 |
| Amuc_2148 | beta-N-acetylhexosaminidase                                                    | 1.03   | 7,62    | 2,30E-02 |
| Amuc_2154 | hypothetical protein                                                           | 1.64   | 8,54    | 8,00E-03 |
| Amuc_2176 | excinuclease ABC subunit A                                                     | 1.19   | 8,75    | 3,74E-03 |

## T2\_O2vsT3\_O2

|           |                                                                                | logFC     | logCPM    | Pvalue    |
|-----------|--------------------------------------------------------------------------------|-----------|-----------|-----------|
| Amuc_1901 | metallophosphoesterase                                                         | 3,0831181 | 8,2555898 | 4,06E-10  |
| Amuc_1301 | cysteine synthase A                                                            | -2,828484 | 11,363636 | 2,56E-09  |
| Amuc_0439 | 30S ribosomal protein S13                                                      | -2,354276 | 9,8971835 | 4,13E-09  |
| Amuc_2051 | glutamate dehydrogenase                                                        | -2,747406 | 9,9682574 | 7,89E-09  |
| Amuc_1654 | leucyl-tRNA synthetase                                                         | -2,279947 | 10,71736  | 1,38E-08  |
| Amuc_0422 | 3,4-dihydroxy-2-butanone 4-phosphate synthase                                  | -2,404636 | 9,4654387 | 3,21E-08  |
| Amuc_0616 | protein serine/threonine phosphatase                                           | 3,3136865 | 7,5315867 | 4,94E-08  |
| Amuc_0485 | 50S ribosomal protein L27                                                      | -2,608255 | 9,0202648 | 2,19E-07  |
| Amuc_2111 | ErfK/YbiS/YcfS/YnhG family protein                                             | -2,134594 | 8,549084  | 2,56E-07  |
| Amuc_0573 | 3'-5' exonuclease                                                              | -2,470652 | 9,1955026 | 2,67E-07  |
| Amuc_1612 | NADH dehydrogenase (quinone)                                                   | -1,805625 | 9,5047812 | 3,25E-07  |
| Amuc_0534 | phosphoribosylformylglycinamide synthase II                                    | -2,022778 | 9,8876794 | 5,40E-07  |
| Amuc_0426 | radical SAM enzyme, Cfr family                                                 | -2,076444 | 9,1054727 | 7,06E-07  |
| Amuc_1694 | cytochrome d ubiquinol oxidase, subunit II                                     | 2,427151  | 7,8897516 | 8,05E-07  |
| Amuc_0469 | N-acetyltransferase GCN5                                                       | 2,636532  | 9,185689  | 1,71E-06  |
| Amuc_1089 | FeoA family protein                                                            | -2,204915 | 10,606229 | 5,91E-06  |
| Amuc_1965 | aspartate kinase                                                               | -1,954368 | 8,7217209 | 6,30E-06  |
| Amuc_1609 | 4Fe-4S ferredoxin                                                              | -1,958321 | 8,2610765 | 7,61E-06  |
| Amuc_1300 | adenylsulfate reductase                                                        | -2,061794 | 10,948189 | 1,62E-05  |
| Amuc_1090 | FeoA family protein                                                            | -1,945762 | 9,3963681 | 2,76E-05  |
| Amuc_1653 | Ribulose-phosphate 3-epimerase                                                 | -2,038659 | 7,0277773 | 3,22E-05  |
| Amuc_0213 | glutamyl-tRNA(Gln) amidotransferase subunit B                                  | -1,828489 | 10,076033 | 3,57E-05  |
| Amuc_0983 | YD repeat protein                                                              | 1,9580647 | 10,614751 | 5,16E-05  |
| Amuc_0425 | signal recognition particle-docking protein FtsY                               | -2,092449 | 7,1589697 | 5,49E-05  |
| Amuc_0955 | ribosome-binding factor A                                                      | 1,9276162 | 9,6668002 | 6,45E-05  |
| Amuc_1693 | 2-oxoglutarate dehydrogenase, E1 subunit                                       | 1,789015  | 9,8574798 | 0,0001124 |
| Amuc_1250 | carbamoyl-phosphate synthase small subunit                                     | -1,532275 | 8,1586652 | 0,0001503 |
| Amuc_0424 | NusB antitermination factor                                                    | -1,970672 | 7,6051034 | 0,0001525 |
| Amuc_1299 | sulfate adenyltransferase subunit 2                                            | -1,950689 | 10,375281 | 0,000317  |
| Amuc_1295 | binding-protein-dependent transporters inner membrane component                | -1,561301 | 10,950387 | 0,0004176 |
| Amuc_0291 | valyl-tRNA synthetase                                                          | -1,346841 | 9,5790453 | 0,0006301 |
| Amuc_1960 | PA14 domain-containing protein                                                 | 1,7058458 | 6,5694799 | 0,0007416 |
| Amuc_1177 | lipocalin family protein                                                       | 1,7053483 | 6,300294  | 0,0011035 |
| Amuc_0270 | shikimate kinase                                                               | 1,1599099 | 8,8413758 | 0,0021792 |
| Amuc_0436 | HAD-superfamily hydrolase                                                      | 1,2968292 | 8,5057113 | 0,0022388 |
| Amuc_1692 | 2-oxoglutarate dehydrogenase, E2 subunit, dihydrolipoamide succinyltransferase | 1,4881232 | 7,7691748 | 0,002355  |
| Amuc_1298 | sulfate adenyltransferase, large subunit                                       | -1,381019 | 10,746457 | 0,0033551 |
| Amuc_0423 | 6,7-dimethyl-8-ribityllumazine synthase                                        | -1,552627 | 6,9055966 | 0,0035626 |
| Amuc_0962 | 4Fe-4S ferredoxin                                                              | 1,1178834 | 7,6453974 | 0,0037849 |
| Amuc_0868 | beta-N-acetylhexosaminidase                                                    | 1,1830352 | 7,2960662 | 0,0038117 |
| Amuc_0038 | glutaminase                                                                    | 1,5693084 | 8,9611051 | 0,0038361 |
| Amuc_0850 | RNA methyltransferase, TrmA family                                             | -1,26071  | 7,9636325 | 0,0038597 |
| Amuc_0888 | MerR family transcriptional regulator                                          | 1,485917  | 6,5001104 | 0,0047559 |
| Amuc_1310 | 17 kDa surface antigen                                                         | 0,9471355 | 9,367004  | 0,0084824 |
| Amuc_1222 | oligopeptide transporter                                                       | 0,902992  | 8,7017587 | 0,0098723 |
| Amuc_0445 | GTP-binding protein YchF                                                       | -1,130249 | 8,618394  | 0,010741  |
| Amuc_1297 | substrate-binding protein of aliphatic sulfonate ABC transporter               | -1,179303 | 10,154277 | 0,0131821 |
| Amuc_1537 | outer membrane autotransporter barrel domain-containing protein                | 1,0880405 | 11,034807 | 0,0139166 |
| Amuc_1922 | ferredoxin                                                                     | -0,967352 | 11,104148 | 0,0194634 |
| Amuc_1321 | alkyl hydroperoxide reductase                                                  | 1,124966  | 10,64336  | 0,0278377 |
| Amuc_0175 | PDZ/DHR/GLGF domain-containing protein                                         | 0,7723019 | 8,8404695 | 0,0458318 |
| Amuc_1517 | ECF subfamily RNA polymerase sigma-24 subunit                                  | 0,7568531 | 7,6162318 | 0,0501435 |
| Amuc_1309 | aldose 1-epimerase                                                             | 0,79048   | 8,7614337 | 0,0624429 |
| Amuc_1757 | phosphotransferase system, phosphocarrier protein HPr                          | 0,8253138 | 9,9653033 | 0,0641482 |
| Amuc_1291 | surface layer protein                                                          | 0,8170864 | 7,3034615 | 0,0659608 |
| Amuc_0787 | rhomboid family protein                                                        | 0,801822  | 9,1860889 | 0,0726464 |
| Amuc_2129 | nickel-dependent hydrogenase large subunit                                     | 0,6806369 | 9,0147144 | 0,0971012 |
| Amuc_1030 | cupin                                                                          | -0,855423 | 5,4633321 | 0,1355599 |
| Amuc_2148 | beta-N-acetylhexosaminidase                                                    | 0,6116368 | 7,6038901 | 0,1370898 |
| Amuc_2072 | rubrerythrin                                                                   | -0,602047 | 9,0064825 | 0,1400122 |
| Amuc_1211 | N-acetylmuramoyl-L-alanine amidase family 2 protein                            | 0,5858091 | 7,1364379 | 0,1454888 |
| Amuc_1408 | chaperonin GroEL                                                               | 0,5394538 | 12,130001 | 0,1489132 |
| Amuc_1972 | HhH-GPD family protein                                                         | -0,695225 | 7,2543545 | 0,1503753 |
| Amuc_0642 | tRNA delta(2)-isopentenylpyrophosphate transferase                             | 0,8173769 | 5,4747345 | 0,1764931 |
| Amuc_0463 | Phosphopantothenoylcysteine decarboxylase                                      | -0,487409 | 7,3112798 | 0,2363912 |
| Amuc_1777 | von Willebrand factor type A                                                   | 0,4785982 | 12,160799 | 0,2730257 |
| Amuc_2131 | hydrogenase maturation protease                                                | 0,4658233 | 6,6870249 | 0,3846652 |
| Amuc_0876 | heavy metal translocating P-type ATPase                                        | -0,375897 | 8,4640434 | 0,4215729 |
| Amuc_0337 | prephenate dehydrogenase                                                       | -0,262005 | 6,9903225 | 0,5121969 |
| Amuc_0865 | rubrerythrin                                                                   | 0,300594  | 9,28322   | 0,5466938 |
| Amuc_2130 | cytochrome B561                                                                | 0,2435824 | 8,7141287 | 0,5469988 |
| Amuc_0775 | thioesterase                                                                   | -0,332983 | 7,5940299 | 0,5562132 |
| Amuc_2176 | excinuclease ABC subunit A                                                     | -0,197821 | 8,7555832 | 0,5983606 |
| Amuc_0650 | S-adenosyl-methyltransferase MraW                                              | -0,158646 | 9,0190582 | 0,6223322 |
| Amuc_0988 | TatD-related deoxyribonuclease                                                 | 0,1841692 | 7,0191819 | 0,6253979 |
| Amuc_0489 | SufBD protein                                                                  | -0,18256  | 9,2444137 | 0,6281635 |
| Amuc_0556 | FmdB family regulatory protein                                                 | 0,2202356 | 5,2415355 | 0,6850028 |
| Amuc_1187 | Alpha-galactosidase                                                            | 0,1444941 | 9,8298793 | 0,7328473 |
| Amuc_0059 | ATPase AAA                                                                     | -0,097593 | 11,23193  | 0,7834778 |
| Amuc_2136 | Glycoside hydrolase, family 20, catalytic core                                 | -0,099948 | 10,143943 | 0,78636   |
| Amuc_0844 | Phosphopyruvate hydratase                                                      | -0,159245 | 8,227131  | 0,8043425 |
| Amuc_0488 | FeS assembly protein SufB                                                      | -0,086016 | 9,4290307 | 0,814634  |
| Amuc_0475 | methyltransferase                                                              | -0,086027 | 6,7806505 | 0,8438369 |



UBIQUINONE AND OTHER TERPENOID-QUINONE BIOSYNTHESIS

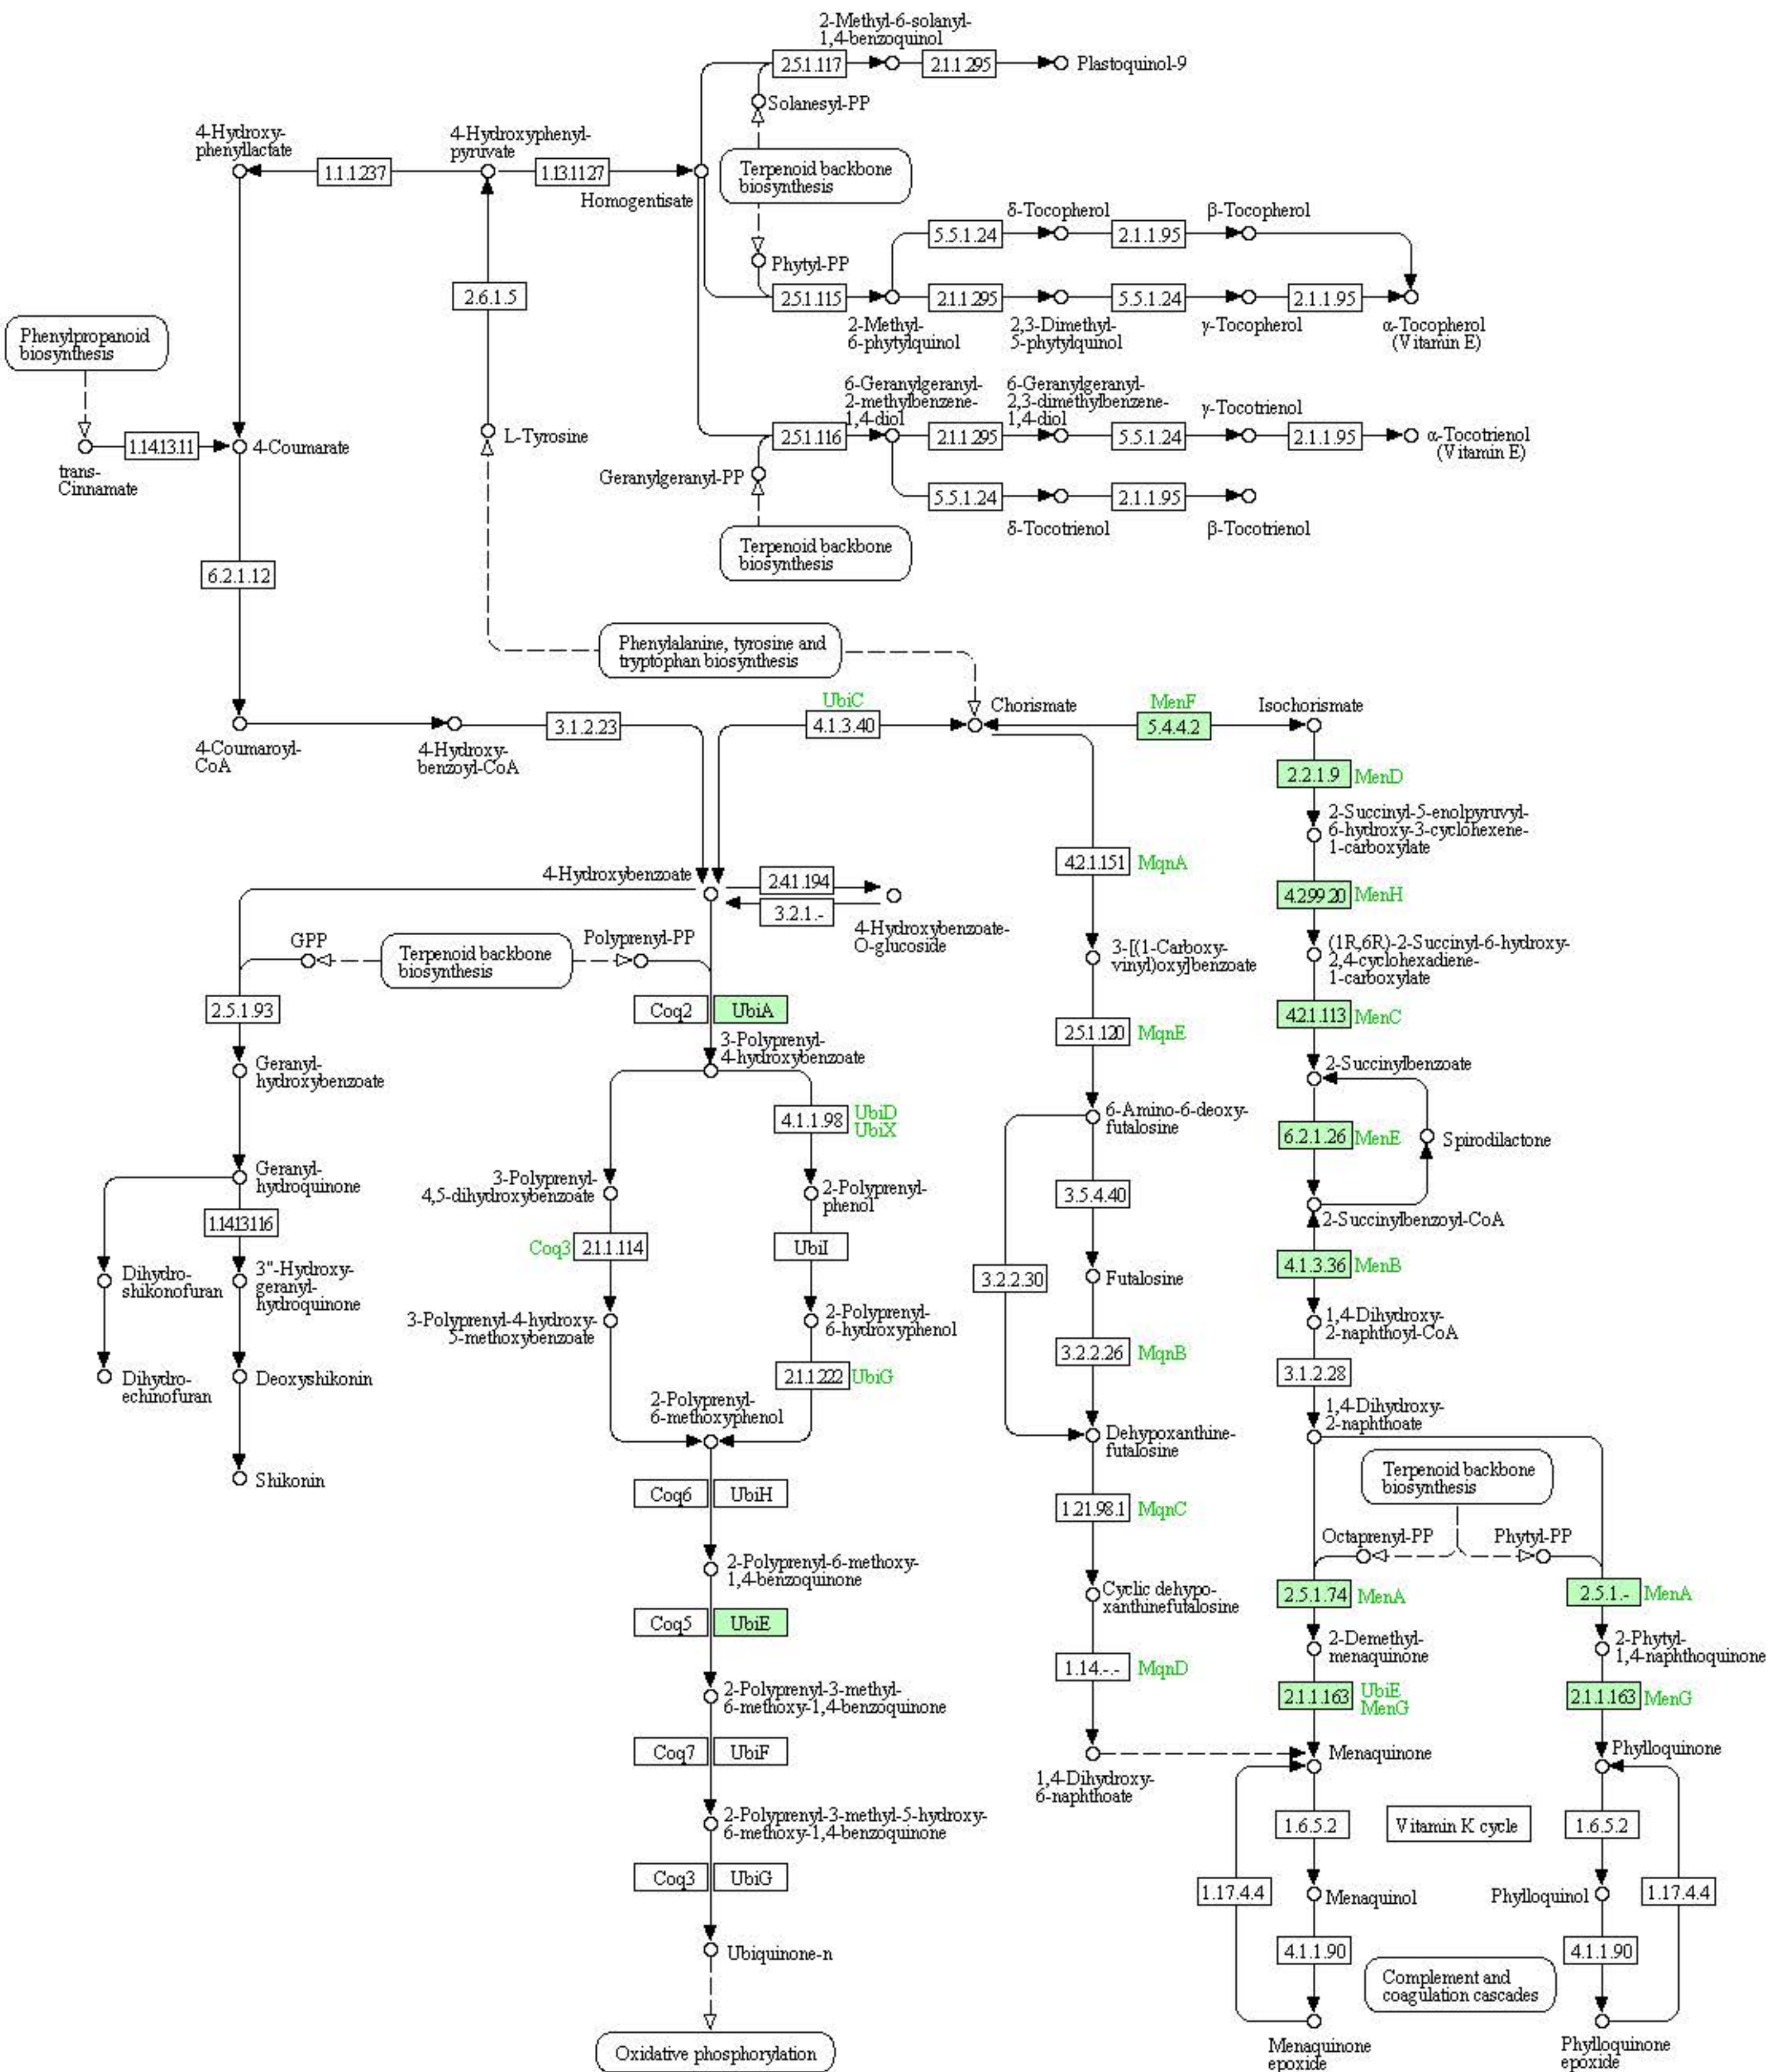



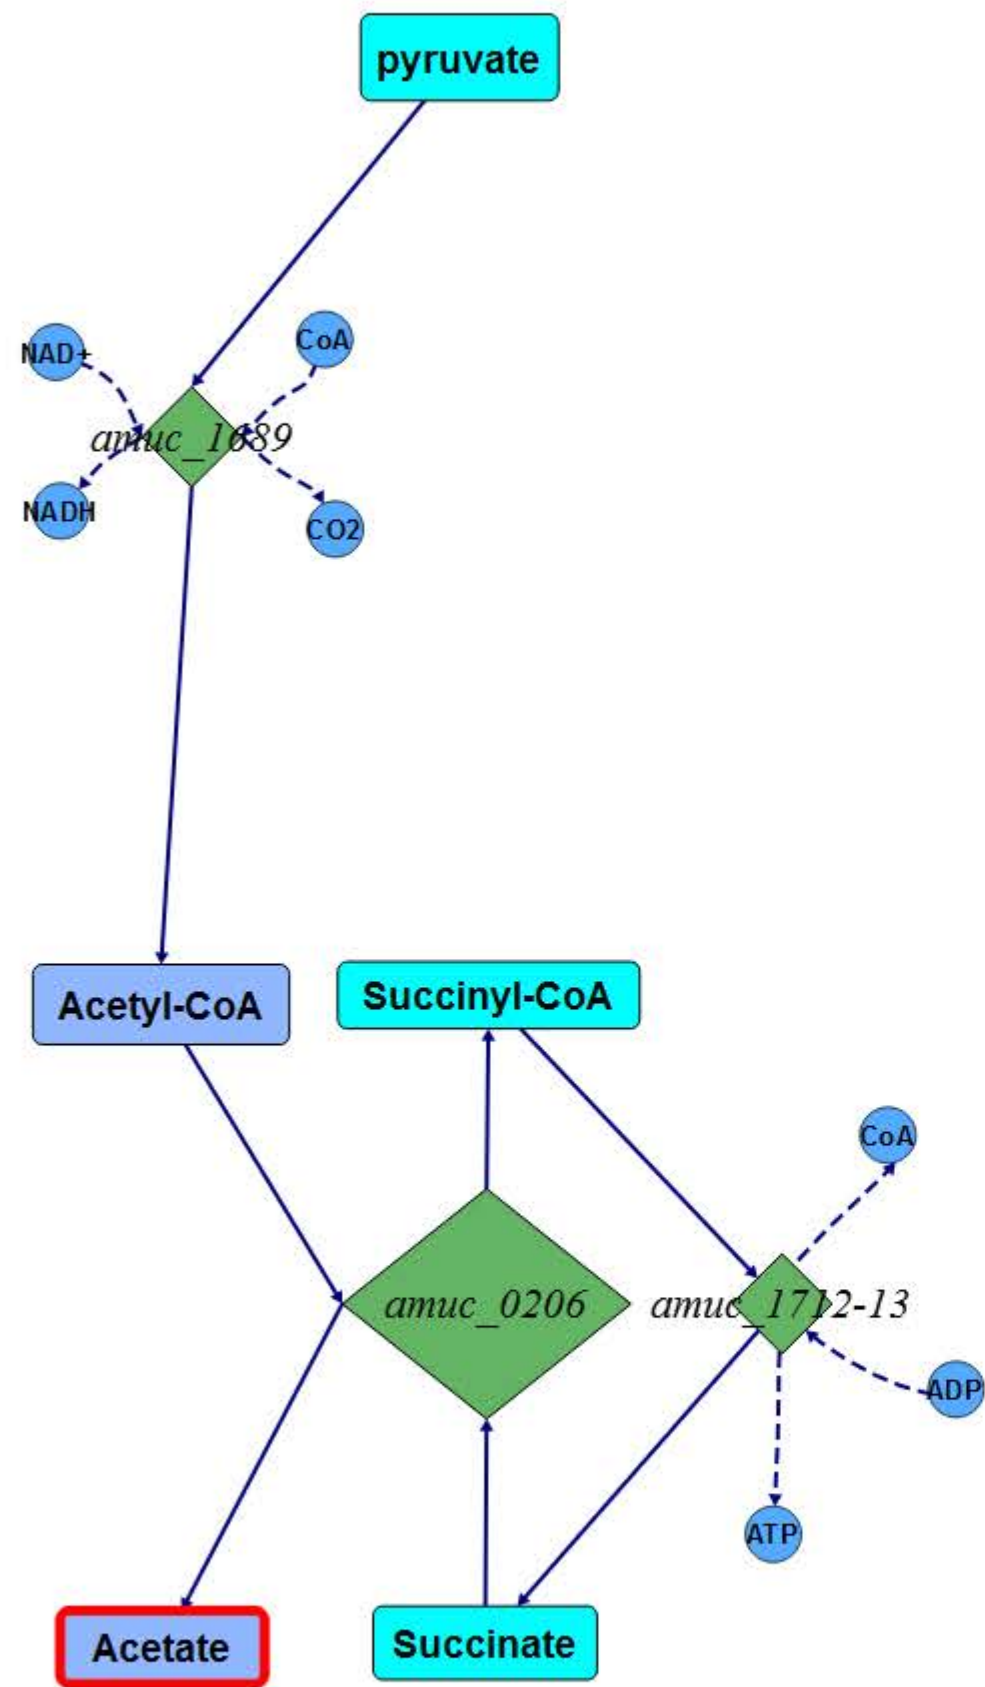

-1 NAD<sup>+</sup>

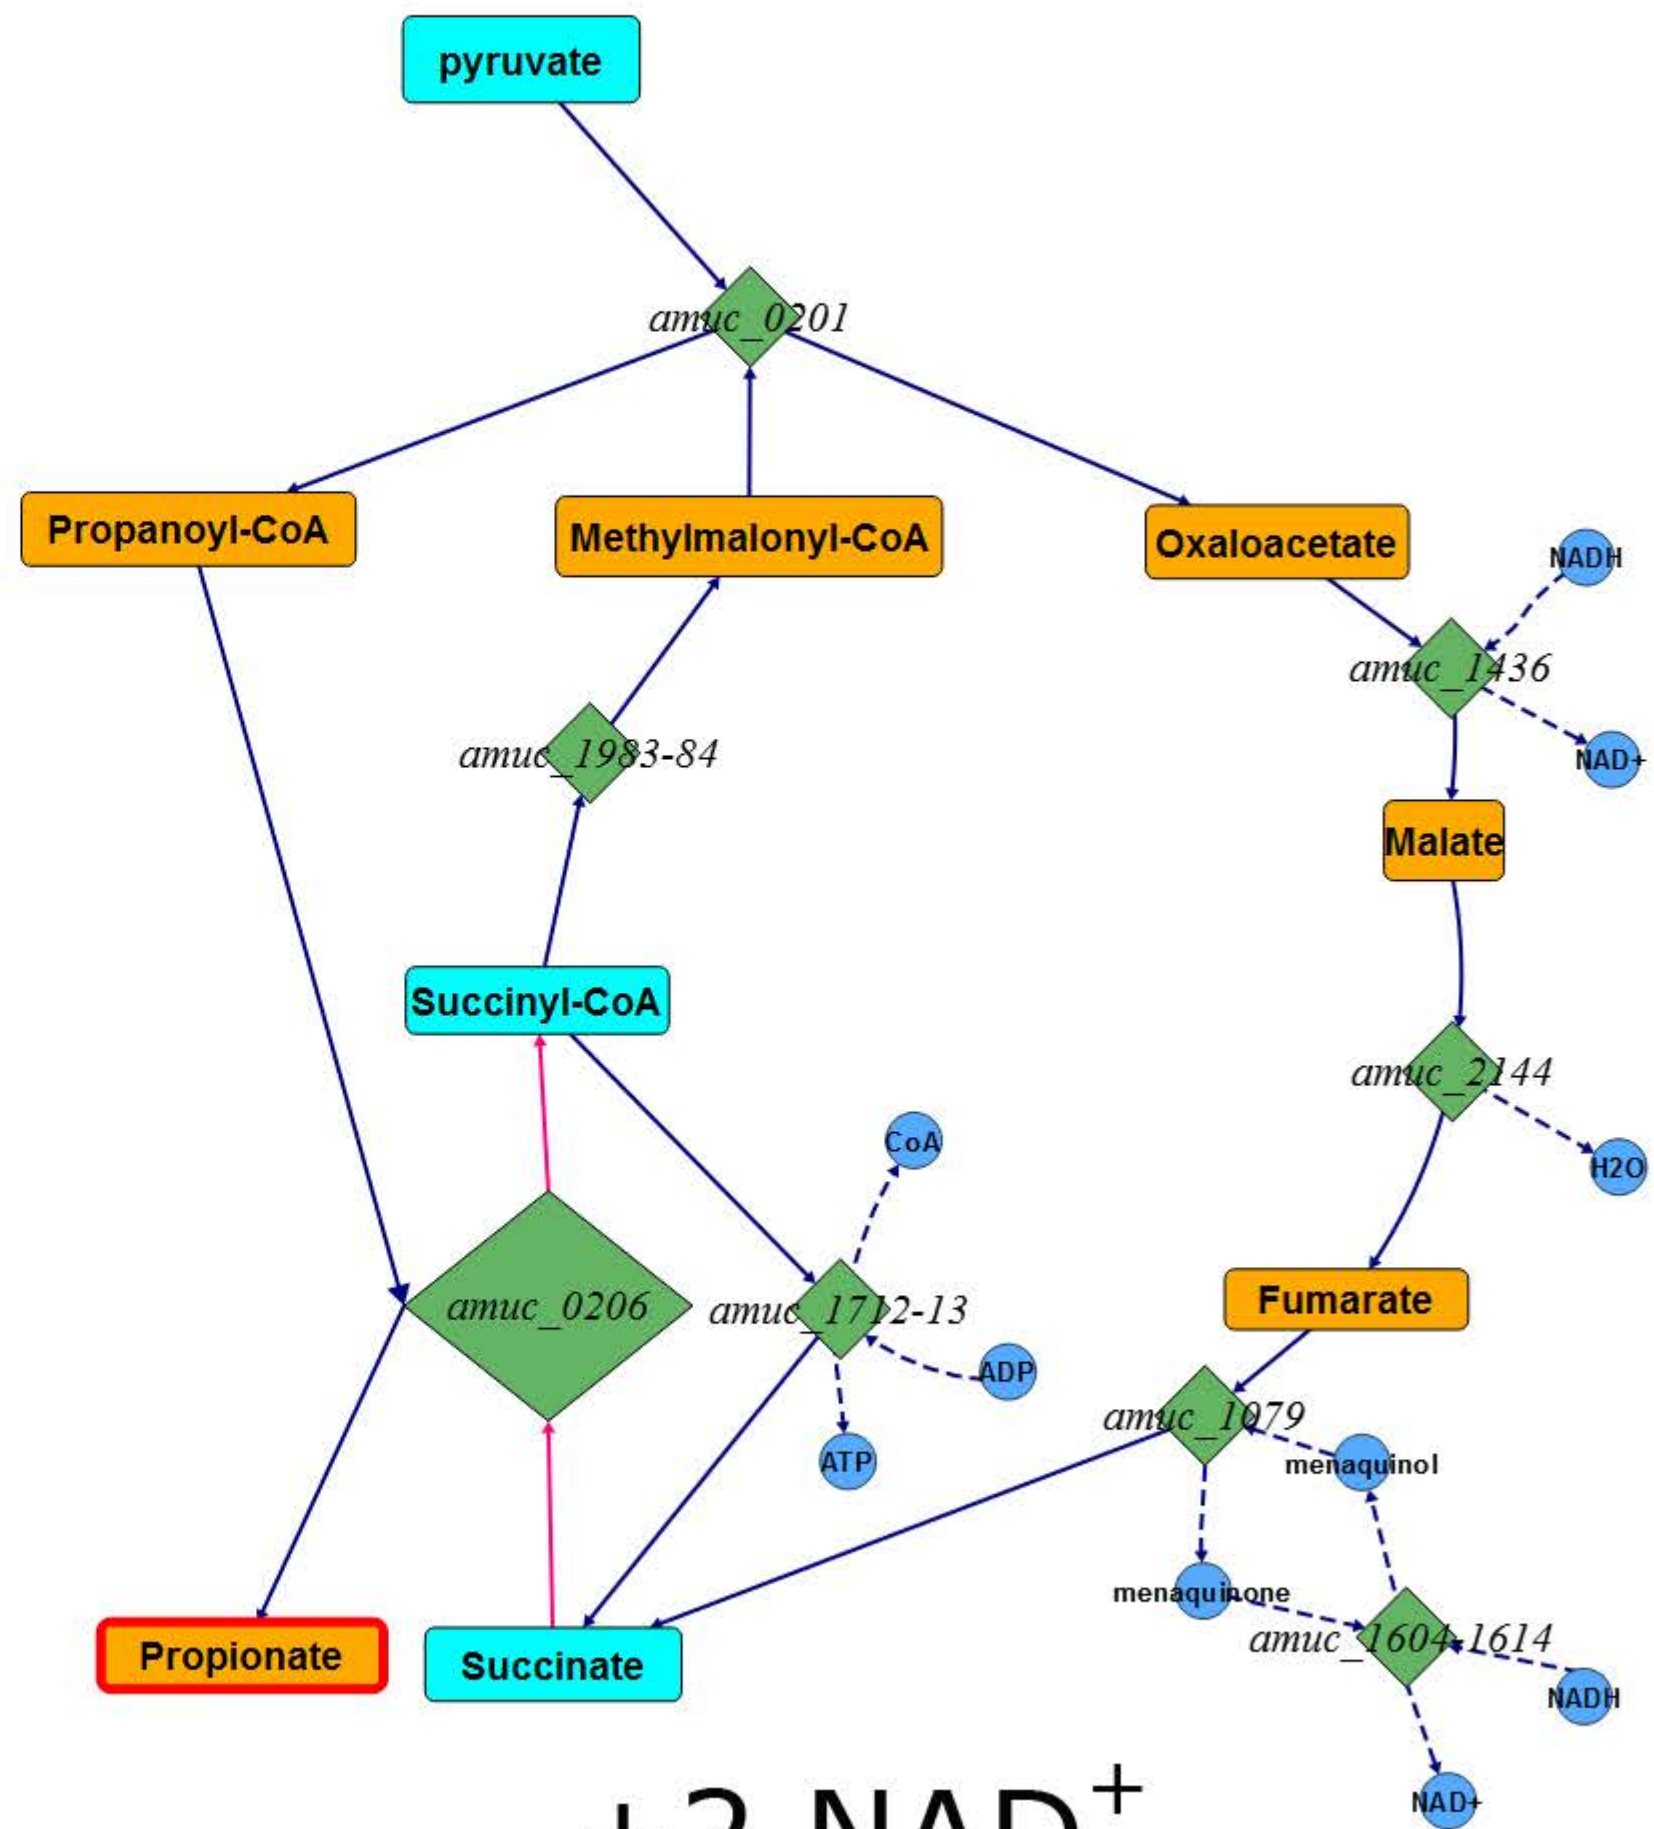

+2 NAD<sup>+</sup>



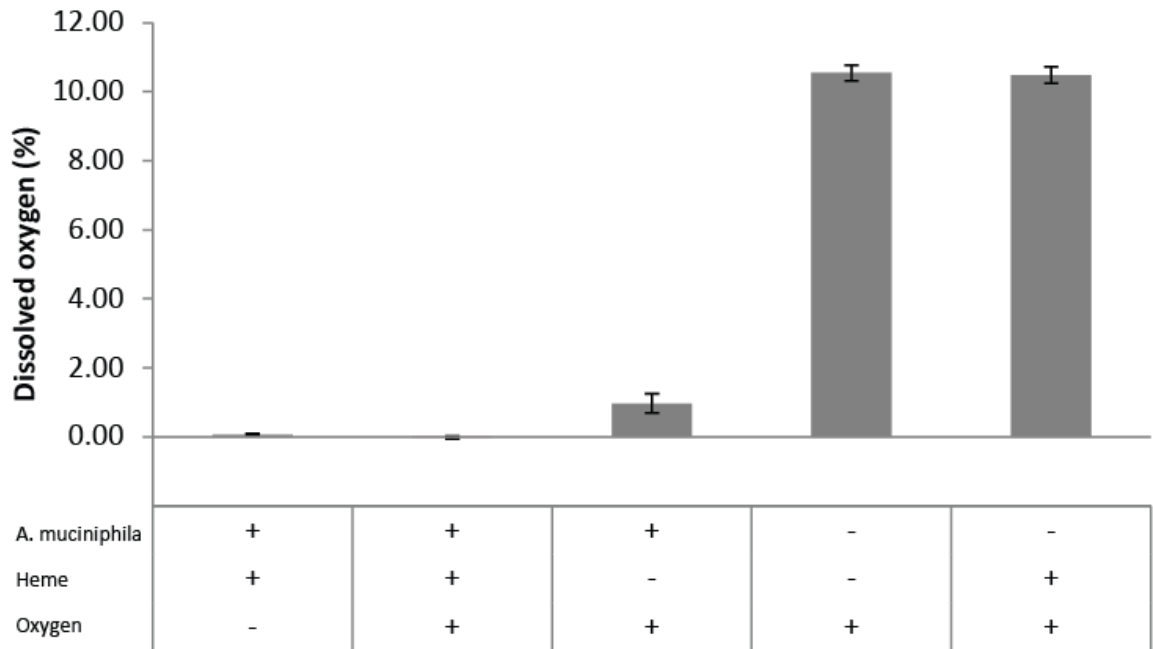

Supplement: AEM.01641-16_zam999117546so1.pdf [file AEM.01641-16_zam999117546so1.pdf]
